# Supplementary material
Source: MDPI journal article supplement (https://www.mdpi.com/1996-1073/10/2/224)
Supplement: s1 [file s1]

# Supplementary Materials: Isolation and Characterization of Native Microalgae from the Peruvian Amazon with Potential for Biodiesel Production

Marianela Cobos, Jae D. Paredes, J. Dylan Maddox, Gabriel Vargas-Arana, Leenin Flores, Carla P. Aguilar, Jorge L. Marapara and Juan C. Castro

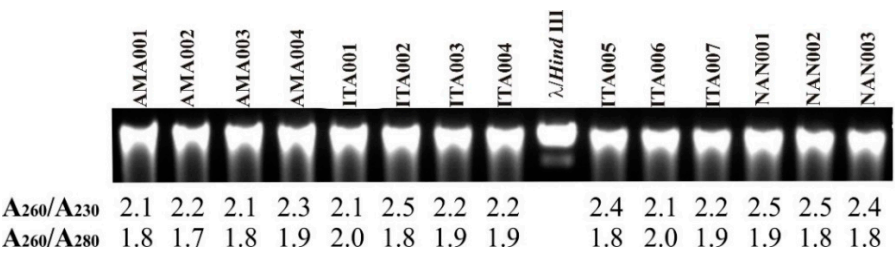

**Figure S1.** Results of electrophoretic and spectrophotometric analysis of the genomic DNA isolated from the fourteen microalgae.

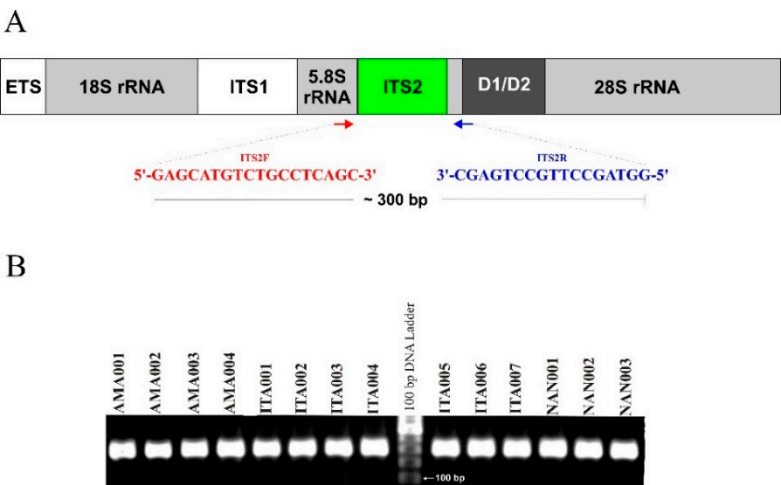

**Figure S2.** ITS2-rDNA structure (A) and amplicons obtained (B) from the microalgae isolated.

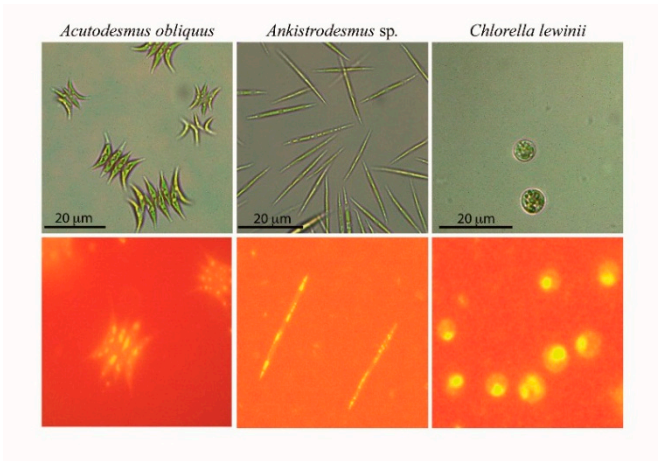

**Figure S3.** Microphotographic images of the three microalgae strains analyzed under light and fluorescence stained with Nile Red.

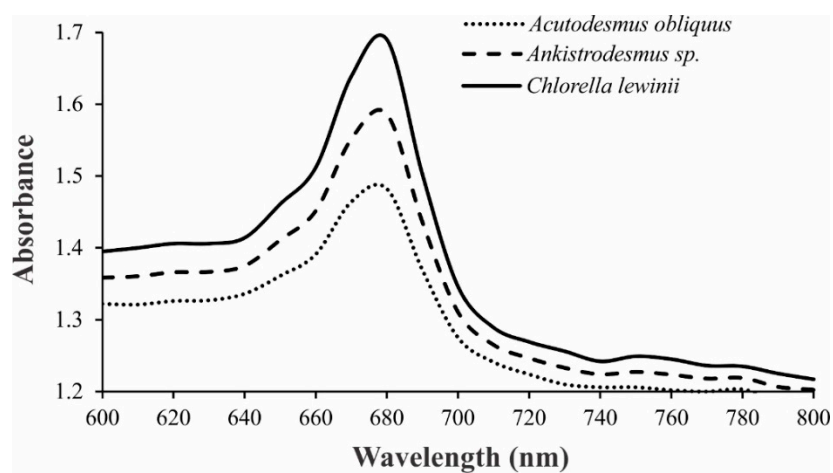

**Figure S4.** Spectrophotometric scanning for the determination of the maximum absorption peak for each microalgae strain.
